# Supplementary material for: Arginine methylation promotes siRNA-binding specificity for a spermatogenesis-specific isoform of the Argonaute protein CSR-1
Source: PubMed Central journal article supplement (PMC8270938; doi:10.1038/s41467-021-24526-6), 2021-07-09
Supplement: 41467_2021_24526_MOESM9_ESM.pdf [file 41467_2021_24526_MOESM9_ESM.pdf]

## **Description of Additional Supplementary Files**

File Name: **Supplementary Data 1**

Description: Small RNA enrichment in CSR-1 immunoprecipitations.

File Name: **Supplementary Data 2**

Description: mRNA expression in *csr-1a(cmp135)* and *csr-1a(cmp143)* mutant animals.

File Name: **Supplementary Data 3**

Description: Peptides captured from 2xHA::CSR-1A IP-mass spectrometry experiment.

File Name: **Supplementary Data 4**

Description: Reagents, resources, and strains used in this study.

File Name: **Supplementary Data 5**

Description: Oligonucleotides sequences used in this study.

File Name: **Supplementary Data 6**

Description: Sequencing library statistics.

File Name: **Supplementary Data 7**

Description: Summary of statistical analysis.
